# Supplementary material
Source: PubMed Central journal article supplement (PMC3318422)
Supplement: supp_80.4.1606_IAI-IAI06212-11-s03.pdf [file supp_80.4.1606_IAI-IAI06212-11-s03.pdf]

Ag APN1 : MVRLL-LLVSLGLCLLAS--ADRPPYKSSGIYEEEPQL-PGASDLSGGVASDEIGVAPAQA--VD-----ERYRLPTTSIPIHYDLHLRT : 80  
 Hs APN : MAKGFYISKSLGILGILLGVAAVCTIIALSVVYSQEKKNANS SPVASTTPSASATTNPASATTLDQSKAWNRYRLPNTLKPDSYRVTLRP : 91

---

Ag APN1 : EIHRNER---TETGTVGIQLQVVOATDKLVMENRGI VMSSAKVS-SLPNGVTCA-PTLIGDVOYSTD TFEHITFTSPTILOPGTYLLEVA : 166  
 Hs APN : YLTPNDRGLYVEKSSSTVRFTCKEATDVI I IHSKKLNYTLSQGHRVVLRGVGSQPPDIDKTELVEPTEY-LVVHLKGLSLVKDSQYEMDSE : 181

---

Ag APN1 : EQRRLATNDDGFYVSSYVADNGERRYLATTOFESTSARMAFPCYDEFGKATFTVSITHSLSYKAISNM-POKTTTDIETD--MRTTFEEK : 254  
 Hs APN : EECRLADDLAIFYRSEYMEGN-VRKVVATTOMQAADARKSEFPCFDEPAMKAENITLIHPKDLTALSNNMLPKGPSTPLPEDPNWNVTEFHT : 271

---

Ag APN1 : TPAMSTYLLAFVVSDFQLRLSG-----AQRVYVRPNAFN--EATFALEAGVKILKVLDDHLGIPYDTYMPKLDQIAIPDFAAGAMENWGLV : 338  
 Hs APN : TPKMSTYLLAFIVSEEDYVEKQASNGVLIIRIWARPSAIAAGHGDYALNVTGPIINFFAGHYDTPY--PLPKSDQIGLPDFNAGAMENWGLV : 360

---

Ag APN1 : TYREQALLNEPAVSTYRGKTNVAITTAHEYAHQWFGNLVSPWEWEYIWLNEGFA TL YEFYALDMAYPGQEYWELFNQOVIQYAMGODGOAS : 429  
 Hs APN : TYRENSILLEDELSSSSSNKERVVIVIAHEL AHQWFGNLVTIEWWNDLWLNEGFA SYVEYLGADYAEPTWNLKDLMLVNDVYRVMAVDALAS : 451

---

Ag APN1 : TRPMNWN---AATPEGEISALEFDRVAYDKSGSVLNMRRHVLGDDNWKAGLKAYLTDRALQGAVDEQLYAGLQSAIEGKGVLPNGVTVAQIMR : 517  
 Hs APN : SHPLSTPASEINTPAQISELFD AISYSK GASVLRMLSSFLSEDVFKQGLASYLHTFAYQNTIYLNLDWHLQEA VNNRSIQ-LPTTVRDI MN : 541

---

Ag APN1 : TWTNEAGYPVLNVRYSYDTGDV IISOERFYNDRK-----VPNTNIWMIPYNYVHQAKADFNEFDDFQWLATKAARIETTVPANEWIVFNK : 602  
 Hs APN : RWTLQMGFPVITVD---TSTGTLSEHEHLLDPDSNVTRPSEFN YVWVPEITSIRDGR----QQQDYWLIDVRAQNDLFSTSGNEWVLLNL : 624

---

Ag APN1 : QQVGYRVNYDEENWELITNALHENWASIHRLNRAQLIDDAYWLARSGRDLRVALRFMTYLRNERYAPWTAANVALTYFNNRLRGTA EY : 693  
 Hs APN : NVTGYRVNYDEENWRKIQTQLQRDHSALPVINRAQIINDAFNLASAHKVPVTLALNNTLFLIEEROYMPWEAALS SLSYFKLMFDRSEVY : 715

---

Ag APN1 : HNFLIFVDALIEDIYSL LTI---DAVSPDDTLHKY-IVQTLSTWACSMGYTDCLMKTAATLKAEAS-GTGPAVHPDIASVTYCYGMRSAL : 779  
 Hs APN : GPMKNYLKKQVTPLFIHFRNNTNNWREIPENLMDQYSEVNAIST-ACSNGVPECEEMVSGLEKQWMPNPNNP IHNLRSTVYCN AIAQGG : 805

---

Ag APN1 : ESEFQYLYRKMNSKNLAERTM I DSI GCSNNKEFLKAEFTTALGSGTGVEINYRADERRRVVQAIYSGGRTGVDALIEFLMDPALVNEEV : 870  
 Hs APN : EEEWDFAWEQFRNATLVNEADKRAALACSKELWILNRYLSYTLNPD L----IRKQDATST-----IISITNNVIGQGLVWDEV : 880

---

Ag APN1 : S-----TLSTSTNSALSASRTN---NVEMNKLNALITALGSRVNSQTAANLRTTAQANLDWVNGFEGLMISNE LAEF AA : 945  
 Hs APN : QSNWKKLFNDYGGGSFSESNLIQAVTRRFSTEYELQQLQFKDN-EETGFGSGTRALEQALE--KTKANIKWVKENKEVVILQWETE---- : 964

---

Ag APN1 : ETLT TTTAAPT TTTVTAGPTTTTTTPSSAVTTTGTPTSVTTTVVQTTTEEDDGAATIGLSIAALLV SITVHLLMG : 1020  
 Hs APN : -----NSK : 967

**Figure S3. Pairwise sequence alignment of full-length *Anopheles gambiae* APN1 (AGAP004809) and human alanyl (membrane) amino peptidase (NP\_001141.2).** The N-terminal 135 amino acid recombinant AnAPN1 protein fragment is underlined in black, the signal peptide is underlined in gray, and conserved amino acids are shaded in black. The alignment was performed using the proba\_pair alignment algorithm on the T-Coffee (25) web-based server ([www.tcoffee.org](http://www.tcoffee.org) [1]) and edited with GeneDoc (<http://www.nrbsc.org/gfx/genedoc/>) and Adobe Illustrator.

### **References**

- 1. Notredame, C., D. G. Higgins, and J. Heringa.** 2000. T-Coffee: A novel method for fast and accurate multiple sequence alignment. *J. Mol. Biol.* **302**:205-217. Doi:10.1006/jmbi.2000.4042.
